# Supplementary material for: Preclinical specificity & activity of a fully human 41BB-expressing anti-CD19 CART- therapy for treatment-resistant autoimmune disease
Source: PubMed Central journal article supplement (PMC11176803; doi:10.1016/j.omtm.2024.101267), 2024-05-20
Supplement: mmc1.pdf [file mmc1.pdf]

**Supplemental information**

**Preclinical specificity & activity of a fully  
human 41BB-expressing anti-CD19 CART-  
therapy for treatment-resistant autoimmune disease**

**Binghao J. Peng, Andrea Alvarado, Hangameh Cassim, Soprina Guarneri, Steven Wong, Jonathan Willis, Julia SantaMaria, Ashley Martynchuk, Victoria Stratton, Darshil Patel, Chien-Chung Chen, Yan Li, Gwendolyn K. Binder, Rebecca Dryer-Minnerly, Jinmin Lee, and Samik Basu**

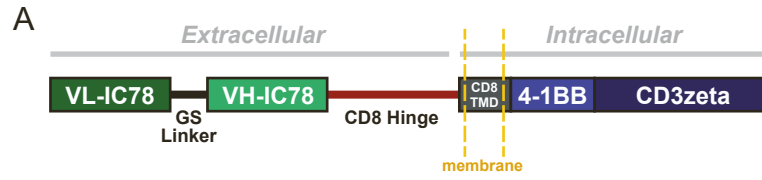

**B**

QAVLTQPPSVSEAPRQRVTISCSGSSSNIGNNAVSWYQQLPGKAPKLLIYYDLLPSGVSDRFSGSKSGTSASLAISGLQSEDEADYYCAAWDDSLNGWVF  
 GGGTKVTVLGGGGGGGGGGGGSEVQLVQSGAEVKKPGESLKISCKGSGYSFTSYWIGWVRQMPGKGLEWMGIIPGDS DTRYSPSFQGGQVTISADK  
 SISTAYLQWSSLKASDTAMYCARLSYSWSSWYWDFWGQGLTVTVSS

**Figure S1. CABA-201.** (A) Schematic of CABA-201 CAR construct. (B) Protein sequence of IC78 binder used in CABA-201 CAR construct.

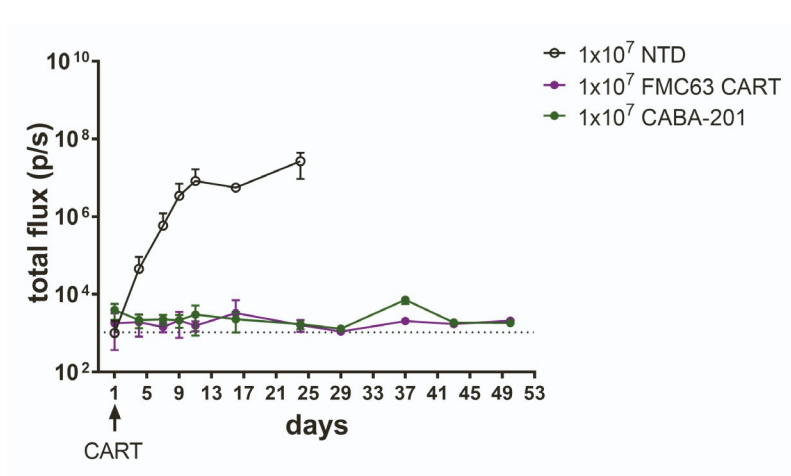

**Figure S2. CABA-201 demonstrates activity in vivo.** Luciferase-expressing Nalm6 cells ( $1 \times 10^6$  cells per mouse) were injected intravenously into NSG mice, followed 5 days later by injection with  $1 \times 10^7$  NTD T-cells, FMC63 CART cells, or CABA-201 cells. Bioluminescence imaging quantification of Nalm6 CD19<sup>+</sup> cells after FMC63 CART, CABA-201 or NTD treatment for days 1, 4, 7, 9, 11, 16, 24, 29, 37, 43, and 50 were plotted as mean  $\pm$  SD for each group (n=12 for NTD and n=18 for FMC63-CART and CABA-201 group). NTD T-cells treated group mice were terminated on day 28 for humane reasons.

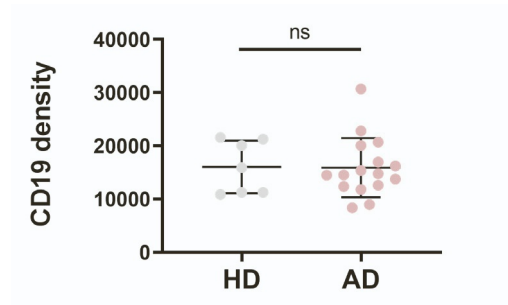

**Figure S3. CD19 surface expression is comparable between healthy and autoimmune disease donors.** CD19 surface expression on isolated B cells from healthy donors (n=7) and various autoimmune disease patients (n=16) were quantified using phycoerythrin (PE) quantification beads (see Methods). Each dot represents CD19 density (number of CD19 per cell) per donor. Mean  $\pm$  SD are shown for HD (healthy donors) and AD (autoimmune disease patients). Autoimmune disease indication includes SLE (n=4), RA (n=9), and chronic inflammatory demyelinating polyneuropathy (CIDP, n=3). Statistical differences between HD and AD were determined by Mann-Whitney test. ns, not significant.

**Table S1. Transduction and expansion of CABA-201 cells derived from autoimmune disease donors.** Transduction efficiency of CAR and cell expansion during generation of CABA-201 cells from multiple autoimmune disease patient materials and types are shown. Donors with less than 5-fold cell expansions were largely due to poor quality of frozen PBMC samples.

| Donor ID         | Indications                        | Transduction Efficiency (%) | Cell expansion (fold) |
|------------------|------------------------------------|-----------------------------|-----------------------|
| mcPV Donor 1     | Mucocutaneous pemphigus vulgaris   | 73.8                        | 3.4                   |
| mcPV Donor 2     |                                    | 65.9                        | 6.8                   |
| SLE Donor 1      | Systemic lupus erythematosus       | 75.8                        | 0.5                   |
| SLE Donor 2      |                                    | 67.5                        | 5.22                  |
| SLE Donor 3      |                                    | 80.7                        | 5.46                  |
| MS Donor 1       | Multiple sclerosis                 | 68.2                        | 15.9                  |
| RA Donor 1       | Rheumatoid arthritis               | 56.1                        | 12.5                  |
| RA Donor 2       |                                    | 38.2                        | 7.9                   |
| SSc Donor 1      | Systemic sclerosis                 | 14.6                        | 7.4                   |
| SSc Donor 2      |                                    | 25.8                        | 20.8                  |
| Myositis Donor 1 | Idiopathic inflammatory myopathies | 38.1                        | 2.5                   |
| Myositis Donor 2 |                                    | 55.0                        | 13.4                  |
| Myositis Donor 3 |                                    | 47.2                        | 7.0                   |
| Myositis Donor 4 |                                    | 74.5                        | 2.1                   |
| Myositis Donor 5 |                                    | 52.8                        | 22.1                  |
